# Supplementary material for: Preliminary Study on an Alternative Test Method with MCTT HCETM for Ocular Irritation Test of Ophthalmic Medical Devices
Source: MDPI journal article supplement (doi:10.3390/toxics11030289), 2023-03-21
Supplement: s1 [file s1]

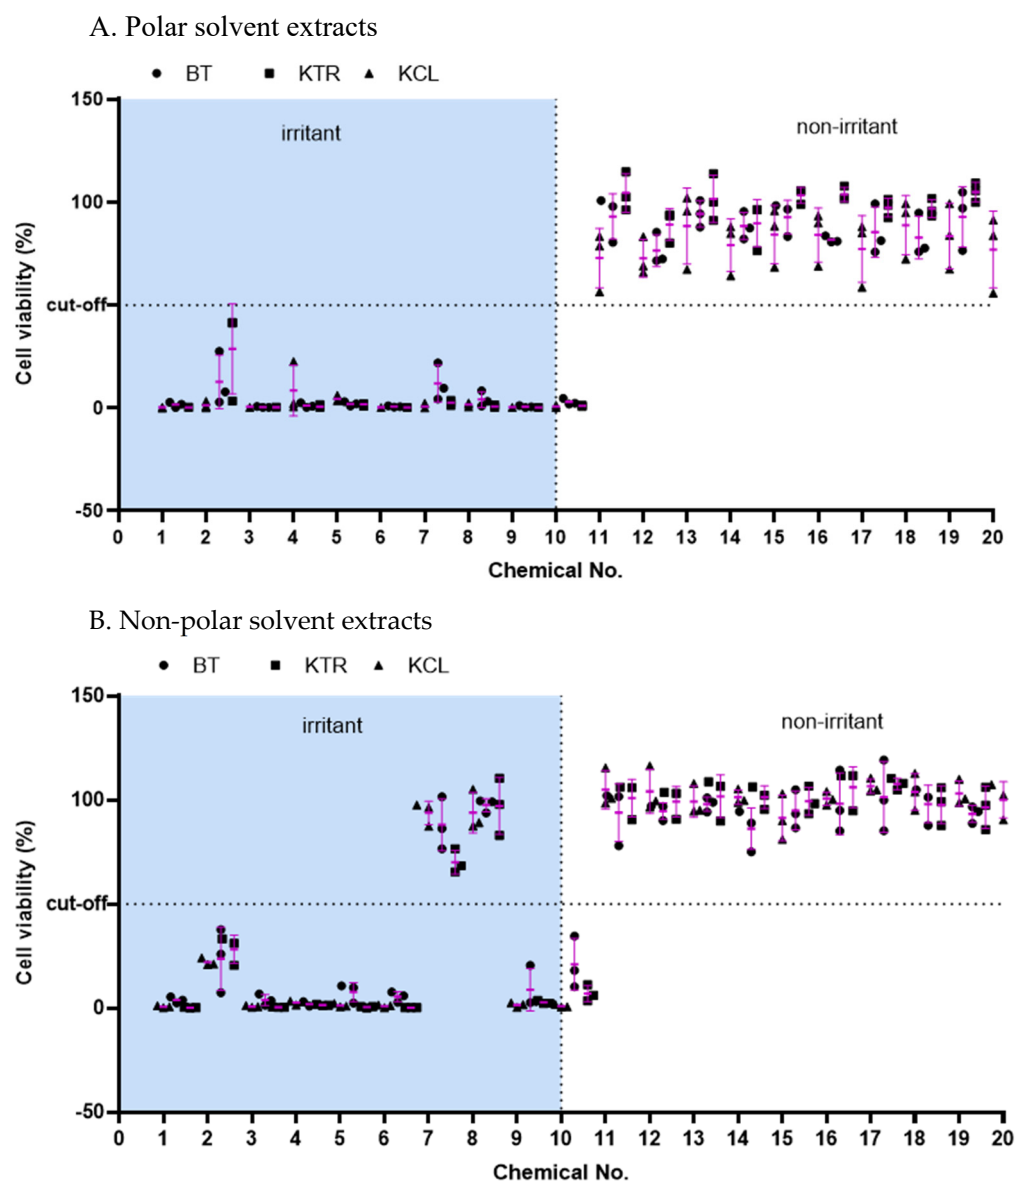

**Figure S1.** Scatter plot results of three replicates on test substances by three laboratories. The first 10 of 20 substances are irritants, and the latter half are non-irritants. The pink lines indicate the mean  $\pm$  SD of each laboratory (error bar) from three replicates. The chemical numbers correspond to the chemicals listed in Tables 2 and 3. .
